# Supplementary material for: Effectiveness of Mental Health Screening and Coordination of In-Theater Care Prior to Deployment to Iraq: A Cohort Study
Source: Atypon-hosted journal article supplement (doi:10.1176/appi.ajp.2010.10091303), 2011-01-19
Supplement: ajp_168_04_378_01.pdf [file ajp_168_04_378_01.pdf]

## Correction

The April 2011 CME course on the article “Effectiveness of Mental Health Screening and Coordination of In-Theater Care Prior to Deployment to Iraq: A Cohort Study” by Christopher H. Warner et al. (Am J Psychiatry 2011; 168:378-385) indicated that an incorrect response was the correct answer for question 2. The course was taken down and replaced with a course in which the appropriate option was listed as the correct answer.

Individuals who took this course between when it was first posted on April 1, 2011, and May 18, 2011, when the course was replaced, may retake the course so that their performance is accurately reflected.
